# Supplementary material for: Metformin Use and Gastric Cancer Risk in Diabetic Patients After Helicobacter pylori Eradication
Source: Oxford University Press journal article supplement (doi:10.1093/jnci/djy144), 2018-07-21

**Supplementary Table 1. ICD-9 codes for outcome and covariates**

| <b>Outcome</b>                                                 | <b>ICD-9 code</b>                                                                                  |
|----------------------------------------------------------------|----------------------------------------------------------------------------------------------------|
| Gastric cancer                                                 | 151, 151.0, 151.1, 151.2, 151.3, 151.4, 151.5, 151.6, 151.8, 151.9, 230.2                          |
| <b>Covariates</b>                                              |                                                                                                    |
| Personal history of smoking and smoking-induced disorders      | 491, 492, 496, V15.82                                                                              |
| Alcohol induced disorders                                      | 291, 303, 305.0, 571.0, 571.1, 571.2, 571.3, 980.8, 980.9                                          |
| <b>Gastrointestinal diseases</b>                               |                                                                                                    |
| Gastric ulcer                                                  | 531                                                                                                |
| Duodenal ulcer                                                 | 532                                                                                                |
| <b>Cardiovascular diseases and cardiovascular risk factors</b> |                                                                                                    |
| Atrial fibrillation                                            | 427.3                                                                                              |
| Congestive heart failure                                       | 402.01, 402.11, 402.91, 404.01, 404.03, 404.11, 404.13, 404.91, 404.93, 428                        |
| Hypertension                                                   | 401-405                                                                                            |
| Ischemic heart disease                                         | 410-413, 414.0, 414.8, 414.9, 429.7                                                                |
| Stroke                                                         | 430-432, 433.01, 433.11, 433.21, 433.31, 433.81, 433.91, 434.01, 434.11, 434.91, 436, 437.0, 437.1 |
| Dyslipidemia                                                   | 272.0-272.4                                                                                        |
| Obesity                                                        | 278.0, 278.1                                                                                       |
| <b>Hepatic and renal diseases</b>                              |                                                                                                    |
| Cirrhosis                                                      | 571.2, 571.5, 571.6, 572.2-572.4, 573.5                                                            |
| Chronic renal failure                                          | 585                                                                                                |

**Supplementary Table 2. Description of various propensity score methods**

| <b>PS analysis</b>                                                  | <b>Description</b>                                                                                                                                                                                                                                                                                                                                                                                                                                                                                                                                                                                       |
|---------------------------------------------------------------------|----------------------------------------------------------------------------------------------------------------------------------------------------------------------------------------------------------------------------------------------------------------------------------------------------------------------------------------------------------------------------------------------------------------------------------------------------------------------------------------------------------------------------------------------------------------------------------------------------------|
| PS adjustment after trimming                                        | Individuals in the non-overlapping parts of the PS distribution were excluded. The effect estimate was then derived by including the exposure of interest (metformin use) and the PS into the multivariable Cox regression model                                                                                                                                                                                                                                                                                                                                                                         |
| PS matching without replacement                                     | PS matching with 1:1 ratio without replacement matched each member of the non-exposure group to exposure group                                                                                                                                                                                                                                                                                                                                                                                                                                                                                           |
| PS weighting by IPTW with stabilisation                             | The PS was transformed and subsequently used as weights in the multivariable Cox proportional hazards model in predicting the outcome (i.e. weighted Cox regression using PS weights). The weight of each individual in the exposure group (metformin use) was $1/PS$ while that for the non-exposure group (non-metformin use) was $1/(1 - PS)$ . To account for influence from individuals with extreme weights, 'stabilisation' was done by multiplying IPTW by a constant (i.e. the expected value of receiving the alternative treatment) so as to reduce the standard error of the effect estimate |
| PS, propensity score; IPTW, inverse probability treatment weighting |                                                                                                                                                                                                                                                                                                                                                                                                                                                                                                                                                                                                          |

**Supplementary Table 3. Assessment of balance of covariates between the two groups before and after PS analysis**

| Characteristics                             | Before PS analysis                          |                                              |                                         | PS weighting<br>by IPTW                 | PS matching                             |
|---------------------------------------------|---------------------------------------------|----------------------------------------------|-----------------------------------------|-----------------------------------------|-----------------------------------------|
|                                             | Metformin<br>users, No.<br>(%)<br>(n=5,368) | Non-metformin<br>users, No. (%)<br>(n=1,898) | Absolute<br>standardised<br>difference† | Absolute<br>standardised<br>difference† | Absolute<br>standardised<br>difference† |
| Median age at<br>triple therapy, y<br>(IQR) | 63.8<br>(55.6 – 72.6)                       | 69.7<br>(58.2 – 78.2)                        | 0.37                                    | 0.02                                    | 0.13                                    |
| Male sex                                    | 2716 (50.6)                                 | 1063 (56.0)                                  | 0.11                                    | 0.01                                    | 0.04                                    |
| Median duration<br>of follow-up, y<br>(IQR) | 7.5<br>(5.2 – 10.1)                         | 5.8<br>(3.5 – 8.8)                           | n.a.                                    | n.a.                                    | n.a.                                    |
| Time-weighted<br>average HbA1c ≥<br>7%      | 3437 (64.0)                                 | 754 (39.7)                                   | 0.51                                    | 0.04                                    | 0.10                                    |
| Smoking                                     | 945 (17.6)                                  | 320 (16.9)                                   | 0.02                                    | 0.01                                    | 0.01                                    |
| Alcohol                                     | 61 (1.1)                                    | 55 (2.9)                                     | 0.17                                    | 0.01                                    | 0.03                                    |
| History of gastric<br>ulcer                 | 180 (3.4)                                   | 101 (5.3)                                    | 0.11                                    | 0.02                                    | 0.02                                    |
| History of<br>duodenal ulcer                | 198 (3.7)                                   | 97 (5.1)                                     | 0.08                                    | 0.01                                    | 0.03                                    |
| Hypertension                                | 3246 (60.5)                                 | 1257 (66.2)                                  | 0.12                                    | 0.01                                    | 0.02                                    |
| Dyslipidemia                                | 1483 (27.6)                                 | 499 (26.3)                                   | 0.03                                    | 0.04                                    | 0.01                                    |
| Obesity                                     | 1097 (20.4)                                 | 191 (10.1)                                   | 0.26                                    | 0.01                                    | 0.09                                    |
| Ischemic heart<br>disease                   | 1318 (24.6)                                 | 546 (28.8)                                   | 0.10                                    | 0.01                                    | 0.01                                    |
| Atrial fibrillation                         | 426 (7.9)                                   | 223 (11.7)                                   | 0.14                                    | 0.03                                    | 0.03                                    |
| Congestive heart<br>failure                 | 579 (10.8)                                  | 422 (22.2)                                   | 0.37                                    | 0.01                                    | 0.01                                    |
| Stroke                                      | 935 (17.4)                                  | 406 (21.4)                                   | 0.10                                    | 0.01                                    | 0.01                                    |
| Chronic renal<br>failure                    | 346 (6.4)                                   | 424 (22.3)                                   | 0.65                                    | 0.01                                    | 0.20                                    |
| Cirrhosis                                   | 148 (2.8)                                   | 126 (6.6)                                    | 0.24                                    | 0.01                                    | 0.02                                    |
| Aspirin/<br>NSAIDs/COX-2<br>inhibitors*     | 2649 (49.3)                                 | 808 (42.6)                                   | 0.14                                    | 0.01                                    | 0.10                                    |
| Statins*                                    | 3562 (66.4)                                 | 813 (42.8)                                   | 0.50                                    | 0.01                                    | 0.09                                    |
| Proton pump<br>inhibitors*                  | 654 (12.2)                                  | 312 (16.4)                                   | 0.13                                    | 0.01                                    | 0.03                                    |
| Insulin*                                    | 1575 (29.3)                                 | 500 (26.3)                                   | 0.07                                    | 0.02                                    | 0.03                                    |

PS, propensity score; IPTW: inverse probability treatment weighting; n.a., not available; HbA1c, hemoglobin A1c;

NSAIDs, non-steroidal anti-inflammatory drugs; COX-2, cyclooxygenase-2

\*Drug use was defined as use for more than 180 days

† Standardized difference is the difference in mean or proportion of covariates in the non-metformin vs metformin group divided by the pooled standard deviation. A standardised difference of below 0.2 indicates good balance.

**Supplementary Figure 1: Patient selection flow diagram**

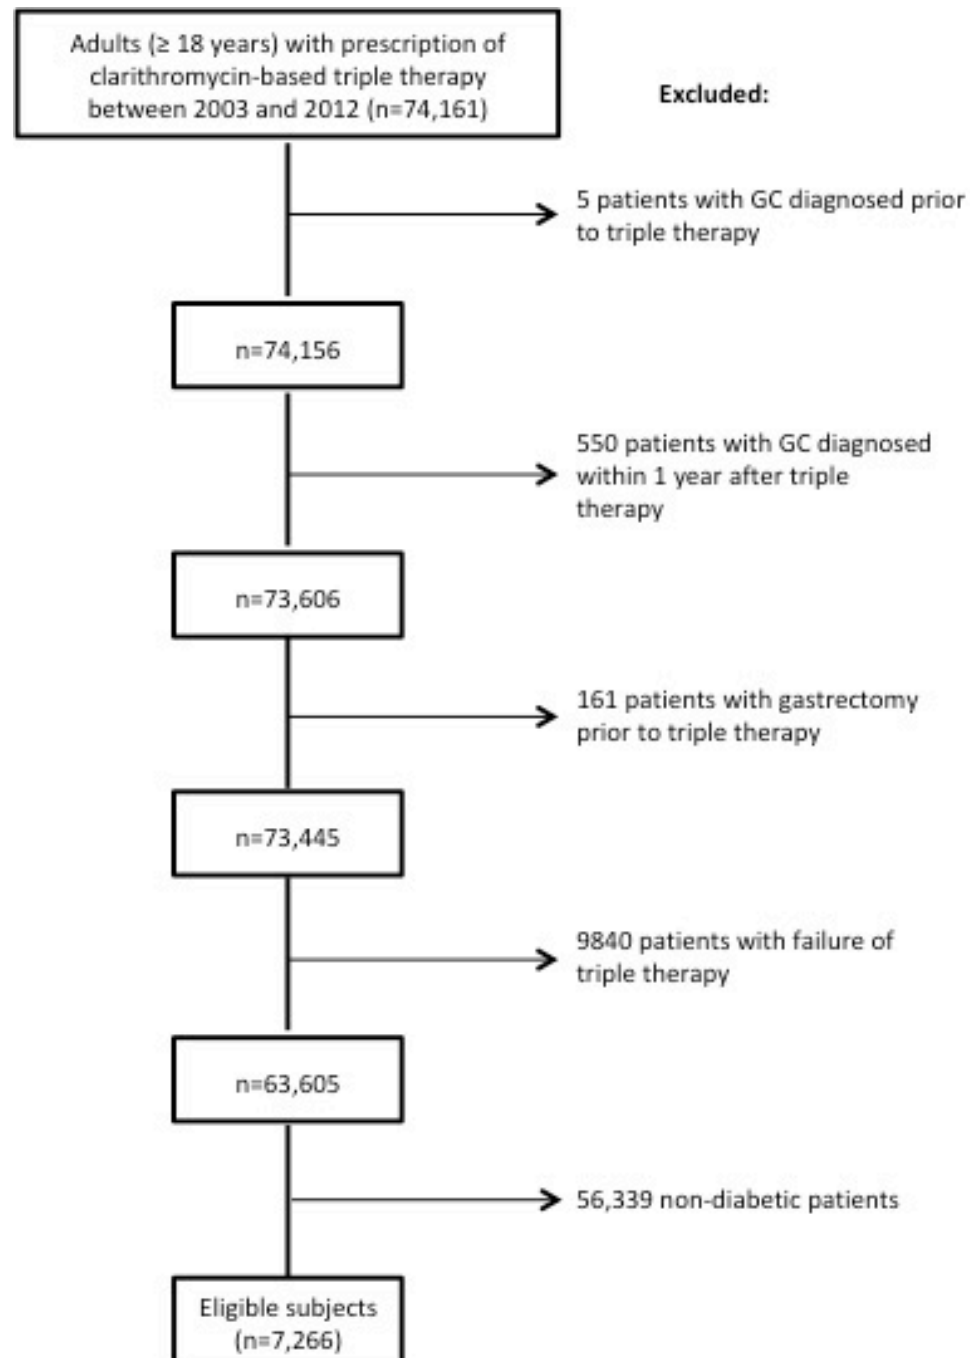

Abbreviations: GC, gastric cancer

**Supplementary Figure 2. Propensity score distributions of metformin and non-metformin users**

**Before propensity score matching**

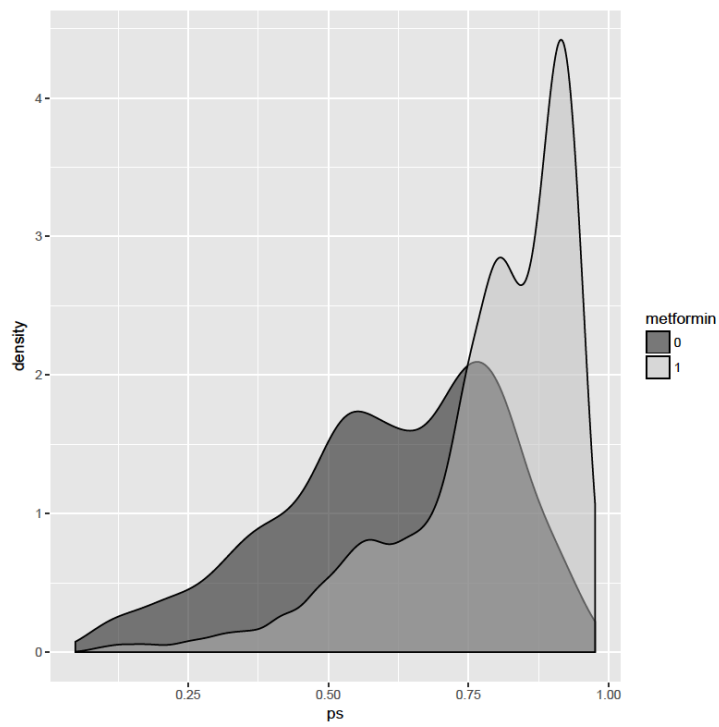

**After propensity score matching**

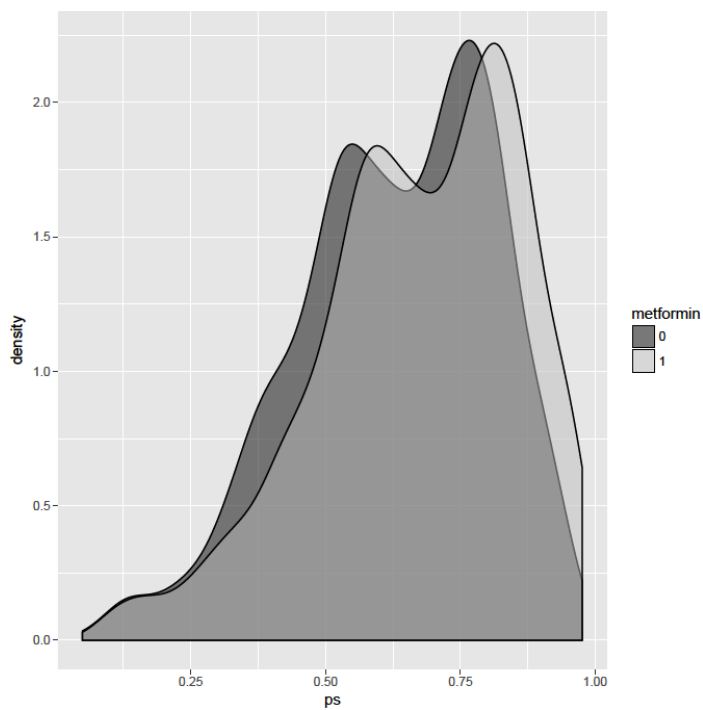

Metformin: 0 = non-user; 1 = user

Supplementary Figure 3. Back to back histogram before and after propensity score matching

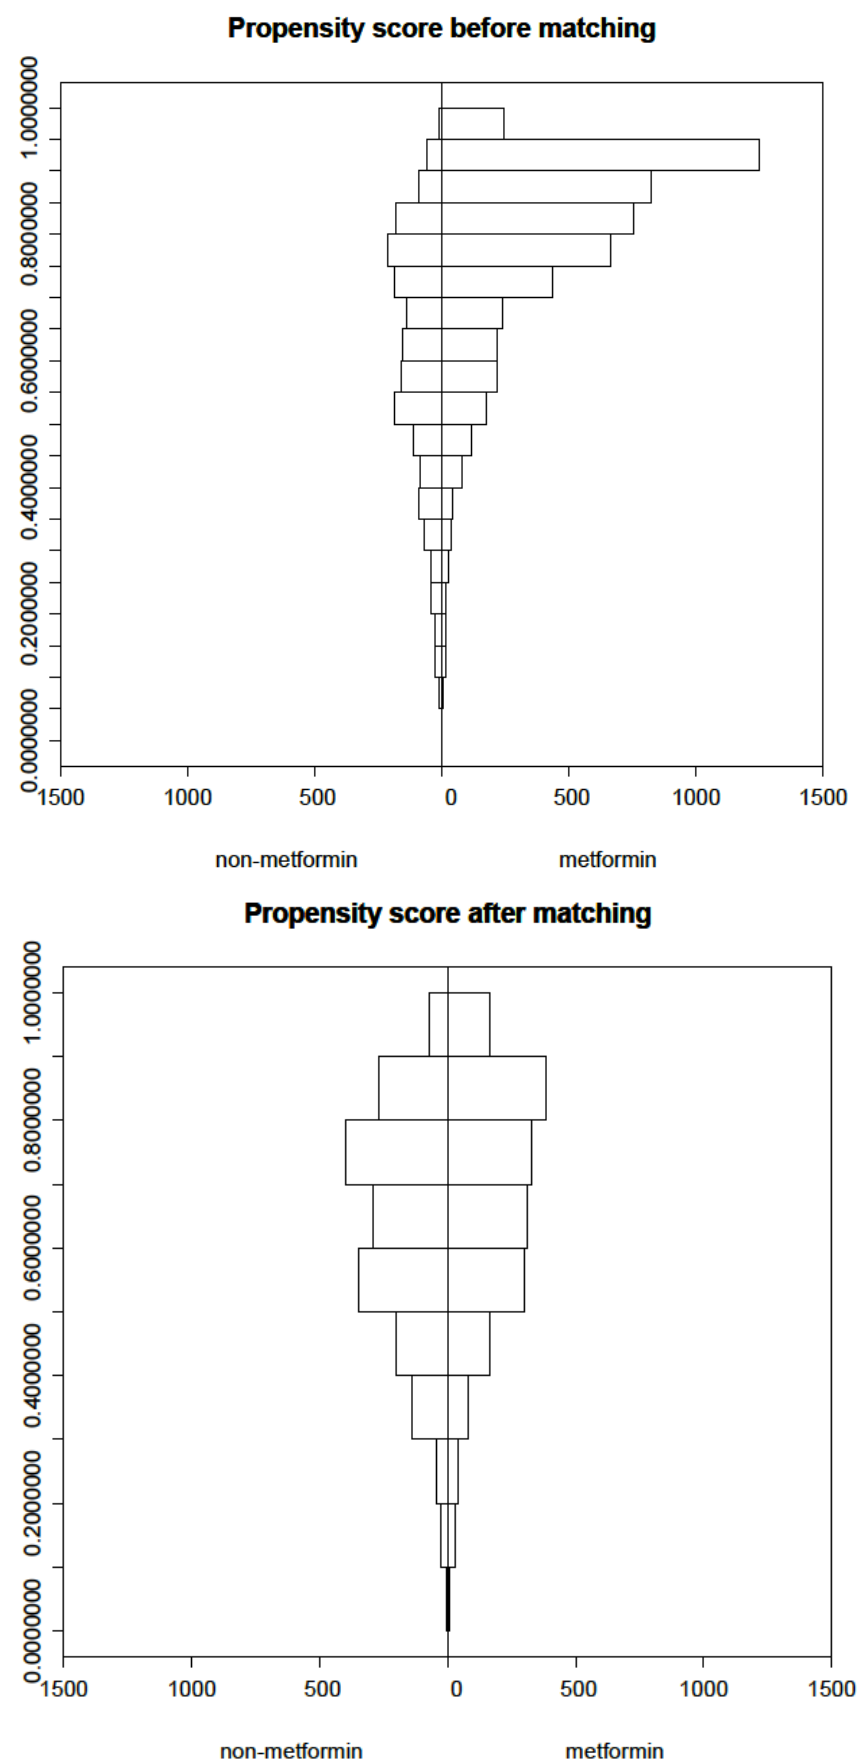

Supplement: supplement_data_djy144.pdf [file supplement_data_djy144.pdf]
